# Supplementary material for: Repetitive Hyperbaric Oxygenation Attenuates Reactive Astrogliosis and Suppresses Expression of Inflammatory Mediators in the Rat Model of Brain Injury
Source: Hindawi journal article supplement (doi:10.1155/2015/498405), 2015-01-01

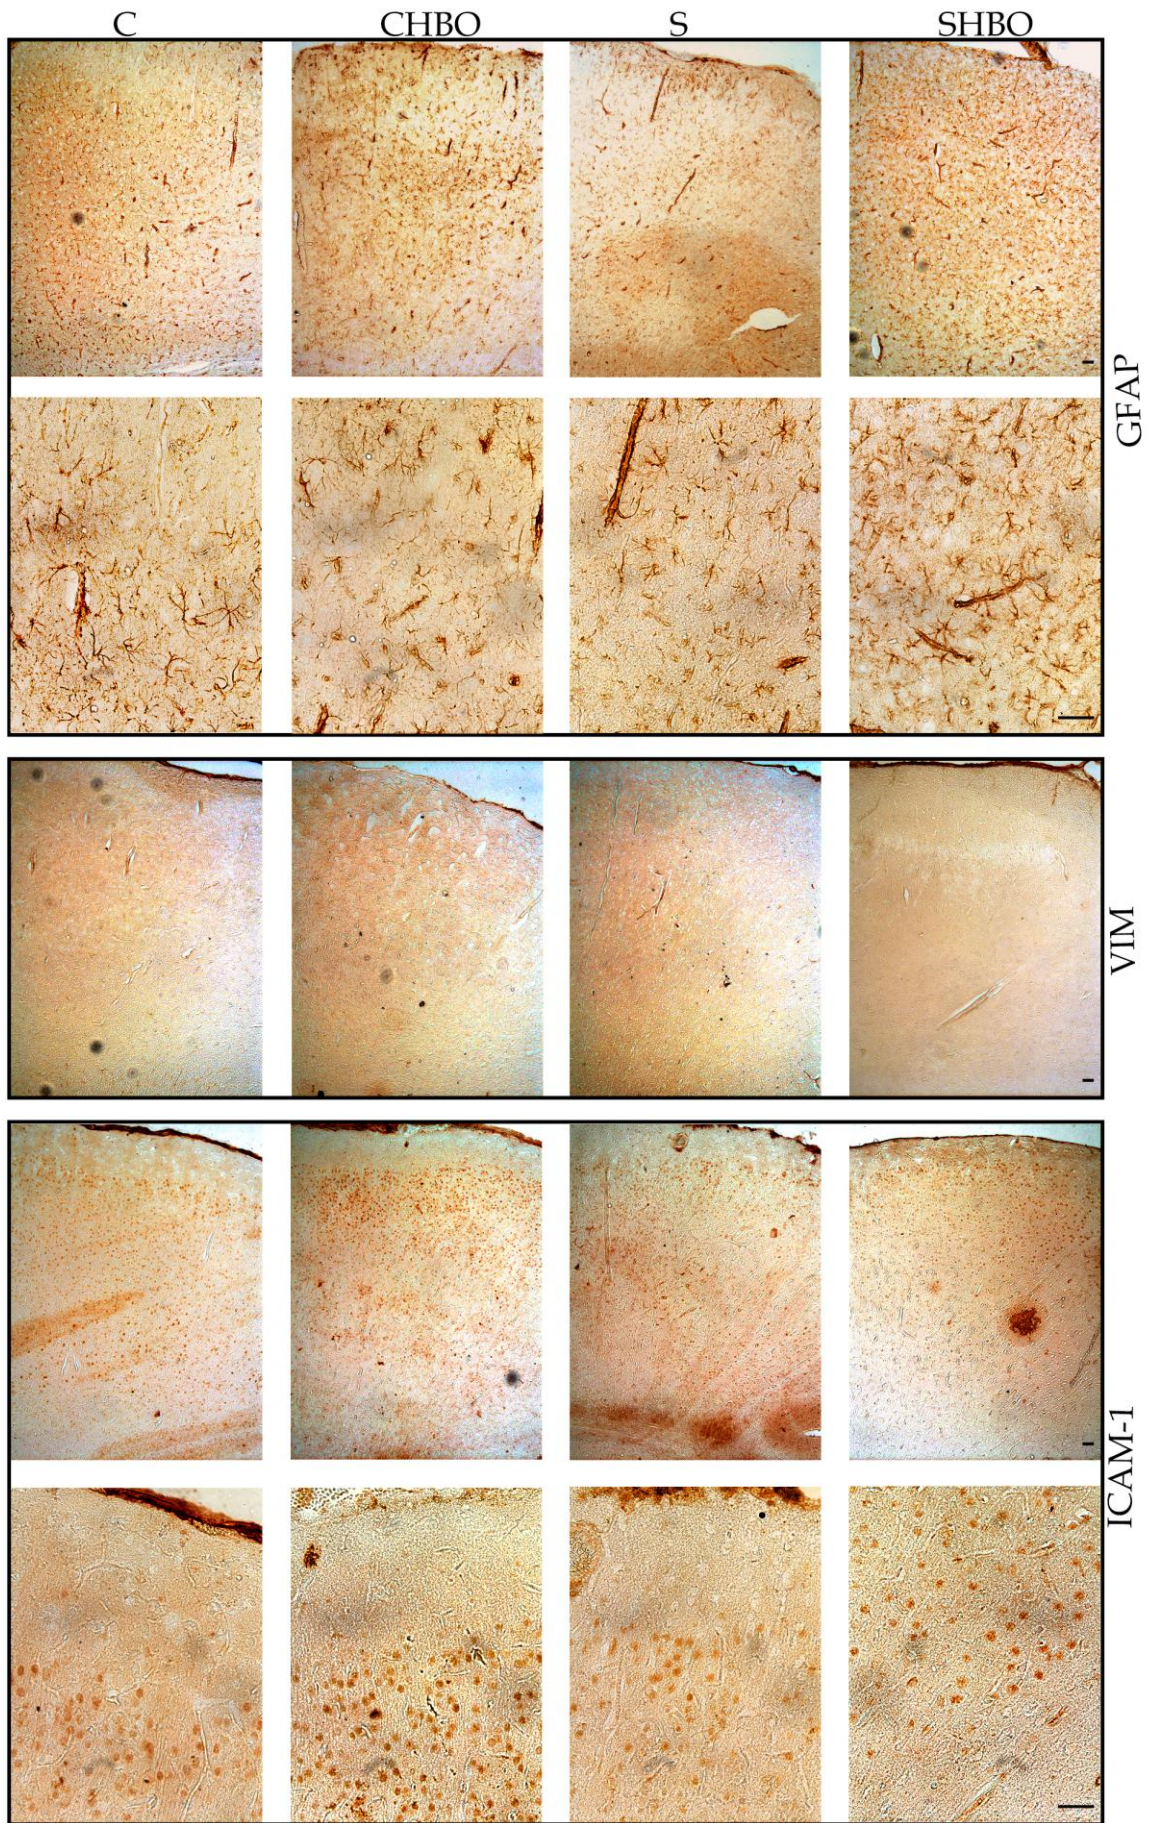



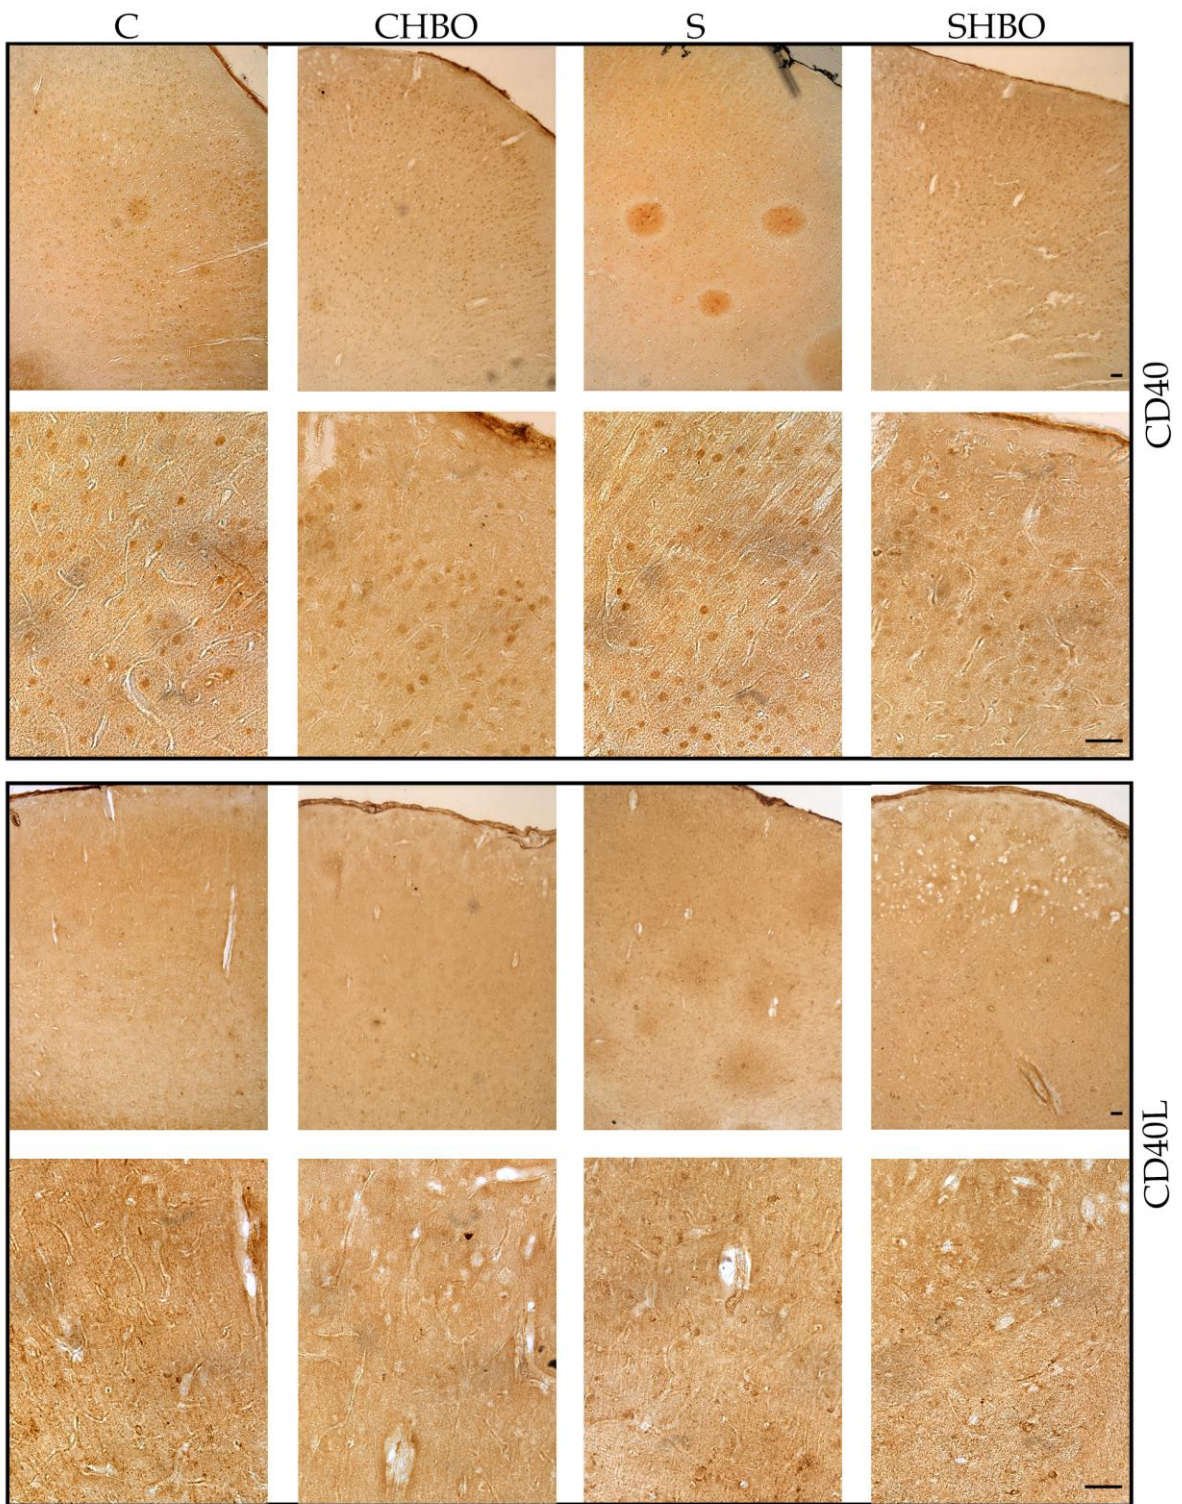

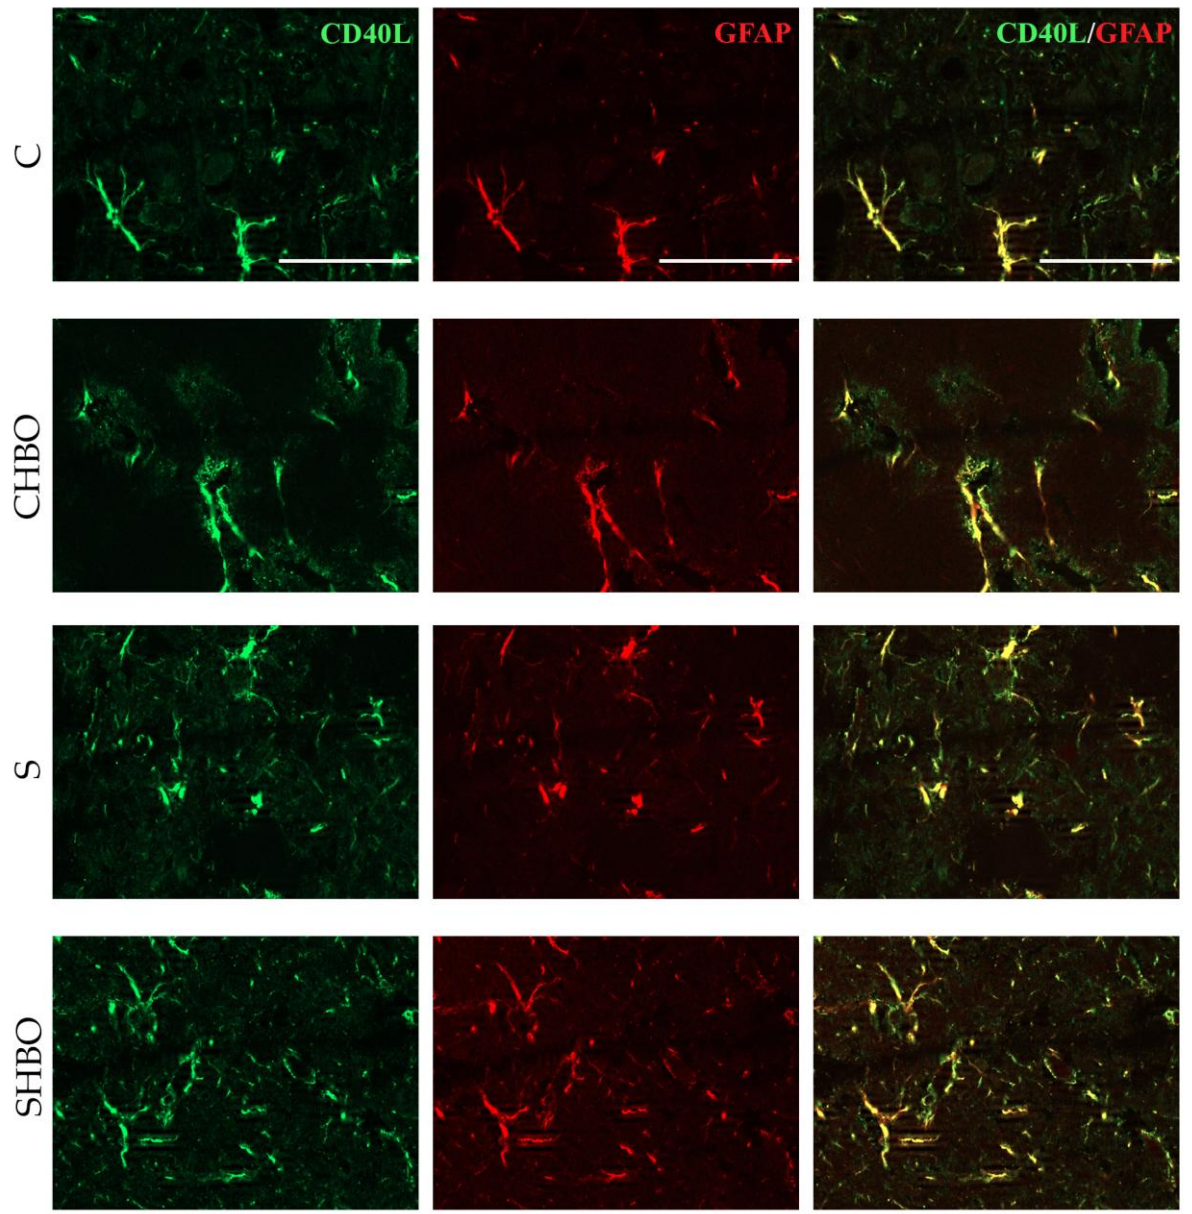

Supplement: f1 [file 498405.f1.pdf]
